# Supplementary material for: Identification of Selection Signatures and Candidate Genes Related to Environmental Adaptation and Economic Traits in Tibetan Pigs
Source: MDPI journal article supplement (doi:10.3390/ani14040654), 2024-02-19

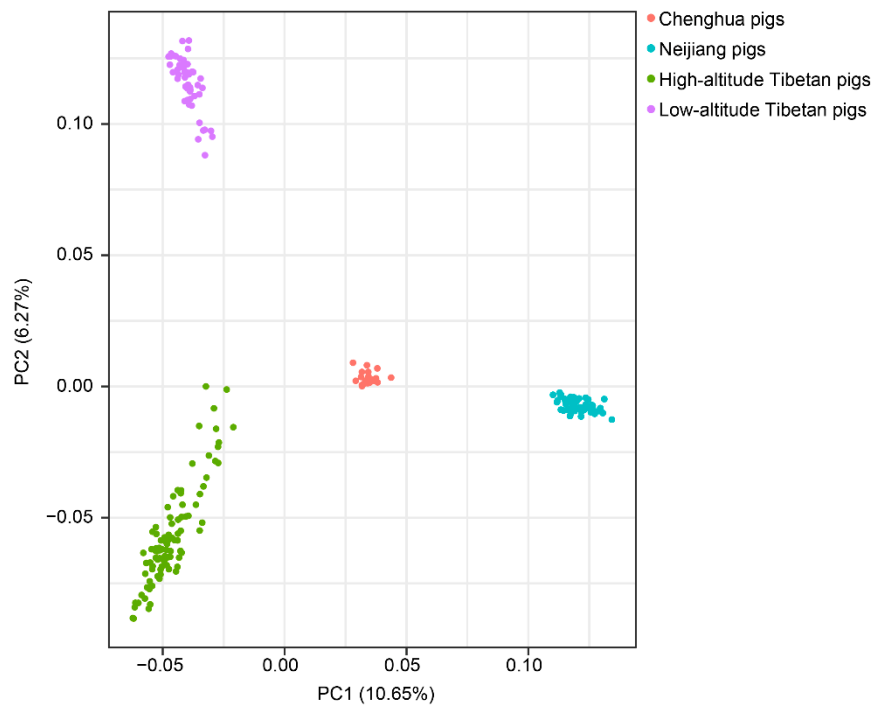

Figure S1. The PCA plots of Chenghua pigs, Neijiang pigs, high-altitude Tibetan pigs and low-altitude Tibetan pigs based on genotyped SNPs.

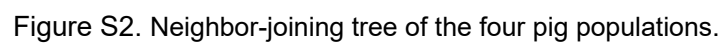

Supplement: s1 [file s1]
