# Supplementary material for: Identification of Selection Signatures and Candidate Genes Related to Environmental Adaptation and Economic Traits in Tibetan Pigs
Source: Animals (Basel). 2024 Feb 19;14(4):654. doi: 10.3390/ani14040654 (PMC10886212; doi:10.3390/ani14040654)
Supplement: Supplementary file 1 [file animals-14-00654-s001.zip › Table S1.xlsx]

## Sheet: High-altitude
Table S1. Candidate SNPs identified in high-altitude and low-altitude Tibetan pigs.
CHROM	SNP	POS
3	CNC10030691	34537194
3	CNC10030697	34889830
3	CNC10030698	34921528
3	CNC10030704	35354225
3	CNC10030719	36152439
3	CNC10030723	36305161
3	CNC10030730	36602705
3	CNC10030732	36671559
3	CNC10030735	36709474
3	CNC10030737	36780422
3	CNC10030742	37034994
3	CNC10030748	37689386
3	CNC10030754	37919636
3	CNC10030757	38112791
3	CNC10030759	38146955
3	CNC10030799	40345351
6	CNC10063165	157470018
6	CNC10063167	157540085
6	CNC10063169	157678351
15	CNC10152094	104618435
15	CNC10152095	104632503
15	CNC10152096	104731516
15	CNC10152104	105052204
15	CNC10152105	105056095
15	CNC10152106	105166304
15	CNC10152117	106243180
15	CNC10152126	106885387
15	CNC10152130	107335694
15	CNC10152131	107406149
15	CNC10152132	107407193
15	CNC10152133	107433840
15	CNC10152135	107518766
15	CNC10152136	107531799
15	CNC10152137	107555465
15	CNC10152138	107572576
15	CNC10152140	107679540
15	CNC10152142	107874933
15	CNC10152145	108309892
15	CNC10152146	108332431
15	CNC10152148	108470002
15	CNC10152152	108911722
15	CNC10152153	108948161
15	CNC10152154	108961504
15	CNC10152155	108976738
15	CNC10152157	109008437
16	CNC10161694	86875355

## Sheet: Low-altitude
Table S1. Candidate SNPs identified in high-altitude and low-altitude Tibetan pigs.
CHROM	SNP	POS
1	CNC10013759	213106704
1	CNC10013762	213289442
1	CNC10013763	213343555
1	CNC10013765	213488913
1	CNC10013772	213902765
1	CNC10013774	213961960
1	CNC10013779	214160122
1	CNC10013787	214548818
1	CNC10013792	214783908
1	CNC10013796	214942310
1	CNC10013799	215165889
1	CNC10013806	215610810
1	CNC10013807	215632274
1	CNC10013808	215636702
1	CNC10013809	215650342
1	CNC10013819	216461695
1	CNC10013820	216464174
1	CNC10013821	216531210
1	CNC10013823	216568451
1	CNC10013825	216634519
1	CNC10013829	216784101
1	CNC10013830	216787534
1	CNC10013834	217096060
1	CNC10013835	217106889
1	CNC10013836	217108435
1	CNC10013841	217247864
1	CNC10013844	217366242
1	CNC10013847	217483331
1	CNC10013848	217544827
1	CNC10013849	217601562
1	CNC10013850	217626491
1	CNC10013851	217684239
1	CNC10013852	217699246
1	CNC10013854	217755804
1	CNC10013856	217764941
1	CNC10013857	217803160
1	CNC10013858	217832130
1	CNC10013859	217835855
1	CNC10013860	217847744
1	CNC10013863	217916722
1	CNC10013864	217921406
1	CNC10013866	218374307
1	CNC10013868	218408262
1	CNC10013869	218492191
1	CNC10013870	218499591
1	CNC10013872	218704626
1	CNC10013873	218781787
1	CNC10013874	218858768
1	CNC10013882	219212815
1	CNC10013884	219287728
1	CNC10013887	219346623
1	CNC10013888	219360244
1	CNC10013896	220070070
1	CNC10013912	220815008
1	CNC10013921	221194950
1	CNC10013926	221482056
1	CNC10013929	221691781
1	CNC10013930	221698278
1	CNC10013931	221772897
1	CNC10013935	221855984
1	CNC10013936	221871001
1	CNC10013942	222277302
1	CNC10013943	222343343
1	CNC10013944	222374897
1	CNC10013945	222391245
1	CNC10013946	222396558
2	CNC10023360	162298086
7	CNC10072659	132355857
7	CNC10072674	133003168
7	CNC10072695	133842277
7	CNC10072697	133860918
7	CNC10072705	134146665
7	CNC10072717	134562880
9	CNC10093039	153224139
9	CNC10093040	153275343
16	CNC10161014	51575511
16	CNC10161015	51686047
16	CNC10161016	51716461
16	CNC10161018	51732193
16	CNC10161025	52143674
16	CNC10161031	52371544
16	CNC10161033	52416884
16	CNC10161041	52851747
16	CNC10161043	53102874
16	CNC10161044	53115105
16	CNC10161045	53128950
16	CNC10161046	53194374
16	CNC10161048	53305582
16	CNC10161049	53336935
16	CNC10161050	53345669
16	CNC10161051	53367596
16	CNC10161054	53505277
16	CNC10161055	53621503
16	CNC10161056	53638038
16	CNC10161057	53756438
16	CNC10161059	53794942
16	CNC10161062	53869291
16	CNC10161063	53881513
16	CNC10161064	53890648
16	CNC10161068	54110747
16	CNC10161079	54699405
16	CNC10161081	54707088
16	CNC10161082	54729987
16	CNC10161083	54790879
16	CNC10161084	54814515
16	CNC10161085	54848472
16	CNC10161086	54871896
16	CNC10161090	55015972
16	CNC10161098	55691446
16	CNC10161099	55699815
16	CNC10161107	56735969
16	CNC10161108	56808557
16	CNC10161114	57132465
16	CNC10161118	57228726
16	CNC10161121	57315354
16	CNC10161122	57339349
16	CNC10161124	57518770
16	CNC10161129	57734373
16	CNC10161139	58150389
16	CNC10161142	58300166
16	CNC10161144	58328528
16	CNC10161153	58751770
16	CNC10161154	58767044
16	CNC10161155	58824670
16	CNC10161159	58915401
16	CNC10161162	58971887
