# Supplementary material for: Identification of Selection Signatures and Candidate Genes Related to Environmental Adaptation and Economic Traits in Tibetan Pigs
Source: Animals (Basel). 2024 Feb 19;14(4):654. doi: 10.3390/ani14040654 (PMC10886212; doi:10.3390/ani14040654)
Supplement: Supplementary file 1 [file animals-14-00654-s001.zip › Table S2.xlsx]

## Sheet: High-altitude
Table S2. Candidate genes identified in high-altitude and low-altitude Tibetan pigs.
Functional region	Gene ID or symbol	Chr	Pos	Alle1	Alle2
intergenic	ENSSSCG00000028454(dist=89996),ENSSSCG00000021710(dist=65675)	3	34537194	G	A
intergenic	ENSSSCG00000021236(dist=86929),ENSSSCG00000007914(dist=29701)	3	34889830	C	A
intronic	ENSSSCG00000007914	3	34921528	C	T
intergenic	ENSSSCG00000007916(dist=314805),ENSSSCG00000007917(dist=637048)	3	35354225	G	T
intergenic	ENSSSCG00000007917(dist=72392),NONE(dist=NONE)	3	36152439	T	C
intergenic	ENSSSCG00000007917(dist=225114),ENSSSCG00000007922(dist=1976331)	3	36305161	A	C
intergenic	ENSSSCG00000007917(dist=522658),ENSSSCG00000007922(dist=1678787)	3	36602705	C	T
intergenic	ENSSSCG00000007917(dist=591512),ENSSSCG00000007922(dist=1609933)	3	36671559	T	C
intergenic	ENSSSCG00000007917(dist=629427),ENSSSCG00000007922(dist=1572018)	3	36709474	A	C
intergenic	ENSSSCG00000007917(dist=700375),ENSSSCG00000007922(dist=1501070)	3	36780422	T	C
intergenic	ENSSSCG00000007917(dist=954947),ENSSSCG00000007922(dist=1246498)	3	37034994	A	G
intergenic	ENSSSCG00000007917(dist=1609339),ENSSSCG00000007922(dist=592106)	3	37689386	T	C
intergenic	ENSSSCG00000007917(dist=1839589),ENSSSCG00000007922(dist=361856)	3	37919636	T	C
intergenic	NONE(dist=NONE),ENSSSCG00000007922(dist=168701)	3	38112791	T	C
intergenic	NONE(dist=NONE),ENSSSCG00000007922(dist=134537)	3	38146955	A	G
intronic	ZNF200	3	40345351	A	G
intronic	NFYC	6	157470018	A	G
intronic	SMAP2	6	157540085	T	C
intronic	SMAP2	6	157678351	C	T
intergenic	WDR75(dist=70861),ENSSSCG00000026081(dist=46796)	15	104618435	T	C
intergenic	WDR75(dist=84929),ENSSSCG00000026081(dist=32728)	15	104632503	A	G
intergenic	ENSSSCG00000027724(dist=49736),ENSSSCG00000028832(dist=34951)	15	104731516	T	C
intergenic	ENSSSCG00000016040(dist=56089),ENSSSCG00000027221(dist=123847)	15	105052204	C	T
intergenic	ENSSSCG00000016040(dist=59980),ENSSSCG00000027221(dist=119956)	15	105056095	G	A
intergenic	ENSSSCG00000016040(dist=170189),ENSSSCG00000027221(dist=9747)	15	105166304	A	G
intergenic	ENSSSCG00000016049(dist=87598),INPP1(dist=115666)	15	106243180	G	A
intergenic	GLS(dist=18713),STAT1(dist=3486)	15	106885387	C	T
intergenic	ENSSSCG00000020860(dist=48165),ENSSSCG00000016061(dist=12827)	15	107335694	T	C
intronic	ENSSSCG00000016061	15	107406149	G	C
intronic	ENSSSCG00000016061	15	107407193	G	A
intergenic	ENSSSCG00000016061(dist=22419),NABP1(dist=224617)	15	107433840	G	C
intergenic	ENSSSCG00000016061(dist=107345),NABP1(dist=139691)	15	107518766	C	T
intergenic	ENSSSCG00000016061(dist=120378),NABP1(dist=126658)	15	107531799	A	G
intergenic	ENSSSCG00000016061(dist=144044),NABP1(dist=102992)	15	107555465	T	A
intergenic	ENSSSCG00000016061(dist=161155),NABP1(dist=85881)	15	107572576	T	A
intergenic	NABP1(dist=12855),ENSSSCG00000026618(dist=72470)	15	107679540	T	C
intergenic	ENSSSCG00000026618(dist=109336),ENSSSCG00000016063(dist=160487)	15	107874933	C	T
intronic	TMEFF2	15	108309892	T	C
intronic	TMEFF2	15	108332431	T	C
intergenic	TMEFF2(dist=73090),NONE(dist=NONE)	15	108470002	T	C
intergenic	TMEFF2(dist=514810),NONE(dist=NONE)	15	108911722	T	C
intergenic	TMEFF2(dist=551249),NONE(dist=NONE)	15	108948161	C	T
intergenic	TMEFF2(dist=564592),NONE(dist=NONE)	15	108961504	G	A
intergenic	TMEFF2(dist=579826),NONE(dist=NONE)	15	108976738	G	T
intergenic	TMEFF2(dist=611525),STK17B(dist=2020977)	15	109008437	C	T
intergenic	ENSSSCG00000017124(dist=34373),NONE(dist=NONE)	16	86875355	C	T

## Sheet: Low-altitude
Table S2. Candidate genes identified in high-altitude and low-altitude Tibetan pigs.
Functional region	Gene ID or symbol	Chr	Pos	Alle1	Alle2
intronic	NTRK3	1	213106704	A	G
intergenic	NTRK3(dist=30674),NONE(dist=NONE)	1	213289442	G	T
intergenic	NTRK3(dist=84787),NONE(dist=NONE)	1	213343555	G	A
intergenic	NTRK3(dist=230145),NONE(dist=NONE)	1	213488913	C	T
intergenic	NTRK3(dist=643997),ESR2(dist=1813144)	1	213902765	G	A
intergenic	NTRK3(dist=703192),ESR2(dist=1753949)	1	213961960	A	G
intergenic	NTRK3(dist=901354),ESR2(dist=1555787)	1	214160122	T	C
intergenic	NTRK3(dist=1290050),ESR2(dist=1167091)	1	214548818	A	T
intergenic	NTRK3(dist=1525140),ESR2(dist=932001)	1	214783908	G	A
intergenic	NTRK3(dist=1683542),ESR2(dist=773599)	1	214942310	C	T
intergenic	NTRK3(dist=1907121),ESR2(dist=550020)	1	215165889	T	G
intergenic	NONE(dist=NONE),ESR2(dist=105099)	1	215610810	G	A
intergenic	NONE(dist=NONE),ESR2(dist=83635)	1	215632274	C	A
intergenic	NONE(dist=NONE),ESR2(dist=79207)	1	215636702	C	A
intergenic	NONE(dist=NONE),ESR2(dist=65567)	1	215650342	G	A
intergenic	WDR89(dist=14068),ENSSSCG00000026382(dist=128430)	1	216461695	T	G
intergenic	WDR89(dist=16547),ENSSSCG00000026382(dist=125951)	1	216464174	A	G
intergenic	WDR89(dist=83583),ENSSSCG00000026382(dist=58915)	1	216531210	T	C
intergenic	WDR89(dist=120824),ENSSSCG00000026382(dist=21674)	1	216568451	T	C
intergenic	ENSSSCG00000026382(dist=6341),ENSSSCG00000005113(dist=4109)	1	216634519	A	C
intronic	RHOJ	1	216784101	G	T
intronic	RHOJ	1	216787534	T	C
intergenic	GPHB5(dist=275014),ENSSSCG00000005118(dist=957881)	1	217096060	A	G
intergenic	GPHB5(dist=285843),ENSSSCG00000005118(dist=947052)	1	217106889	T	C
intergenic	GPHB5(dist=287389),ENSSSCG00000005118(dist=945506)	1	217108435	T	C
intergenic	GPHB5(dist=426818),ENSSSCG00000005118(dist=806077)	1	217247864	C	T
intergenic	GPHB5(dist=545196),ENSSSCG00000005118(dist=687699)	1	217366242	C	A
intergenic	GPHB5(dist=662285),ENSSSCG00000005118(dist=570610)	1	217483331	T	C
intergenic	GPHB5(dist=723781),ENSSSCG00000005118(dist=509114)	1	217544827	A	G
intergenic	GPHB5(dist=780516),ENSSSCG00000005118(dist=452379)	1	217601562	C	T
intergenic	GPHB5(dist=805445),ENSSSCG00000005118(dist=427450)	1	217626491	T	C
intergenic	GPHB5(dist=863193),ENSSSCG00000005118(dist=369702)	1	217684239	G	A
intergenic	GPHB5(dist=878200),ENSSSCG00000005118(dist=354695)	1	217699246	A	C
intergenic	GPHB5(dist=934758),ENSSSCG00000005118(dist=298137)	1	217755804	C	T
intergenic	GPHB5(dist=943895),ENSSSCG00000005118(dist=289000)	1	217764941	A	G
intergenic	GPHB5(dist=982114),ENSSSCG00000005118(dist=250781)	1	217803160	C	T
intergenic	GPHB5(dist=1011084),ENSSSCG00000005118(dist=221811)	1	217832130	A	G
intergenic	GPHB5(dist=1014809),ENSSSCG00000005118(dist=218086)	1	217835855	G	A
intergenic	GPHB5(dist=1026698),ENSSSCG00000005118(dist=206197)	1	217847744	G	T
intergenic	GPHB5(dist=1095676),ENSSSCG00000005118(dist=137219)	1	217916722	T	C
intergenic	GPHB5(dist=1100360),ENSSSCG00000005118(dist=132535)	1	217921406	C	T
intronic	TEK	1	218374307	C	T
intronic	TEK	1	218408262	C	T
intronic	TEK	1	218492191	C	G
intronic	TEK	1	218499591	C	T
intronic	CAAP1	1	218704626	C	T
intergenic	CAAP1(dist=59130),TUSC1(dist=944609)	1	218781787	G	A
intergenic	CAAP1(dist=136111),TUSC1(dist=867628)	1	218858768	C	T
intergenic	CAAP1(dist=490158),TUSC1(dist=513581)	1	219212815	A	C
intergenic	CAAP1(dist=565071),TUSC1(dist=438668)	1	219287728	G	A
intergenic	CAAP1(dist=623966),TUSC1(dist=379773)	1	219346623	C	T
intergenic	CAAP1(dist=637587),TUSC1(dist=366152)	1	219360244	G	C
intergenic	TUSC1(dist=343039),IZUMO3(dist=996737)	1	220070070	A	G
intergenic	TUSC1(dist=1087977),IZUMO3(dist=251799)	1	220815008	A	G
intergenic	IZUMO3(dist=125191),ELAVL2(dist=820862)	1	221194950	T	C
intergenic	IZUMO3(dist=412297),ELAVL2(dist=533756)	1	221482056	T	C
intergenic	IZUMO3(dist=622022),ELAVL2(dist=324031)	1	221691781	T	C
intergenic	IZUMO3(dist=628519),ELAVL2(dist=317534)	1	221698278	G	C
intergenic	IZUMO3(dist=703138),ELAVL2(dist=242915)	1	221772897	C	A
intergenic	IZUMO3(dist=786225),ELAVL2(dist=159828)	1	221855984	T	C
intergenic	IZUMO3(dist=801242),ELAVL2(dist=144811)	1	221871001	A	T
intergenic	ELAVL2(dist=187160),DMRTA1(dist=1267805)	1	222277302	G	T
intergenic	ELAVL2(dist=253201),DMRTA1(dist=1201764)	1	222343343	A	G
intergenic	ELAVL2(dist=284755),DMRTA1(dist=1170210)	1	222374897	A	G
intergenic	ELAVL2(dist=301103),DMRTA1(dist=1153862)	1	222391245	T	C
intergenic	ELAVL2(dist=306416),DMRTA1(dist=1148549)	1	222396558	G	A
intronic	ENSSSCG00000024569	2	162298086	C	T
intronic	DLK1	7	132355857	G	T
intergenic	ENSSSCG00000002581(dist=23267),ENSSSCG00000025827(dist=180197)	7	133003168	C	T
intergenic	ENSSSCG00000002613(dist=20688),ENSSSCG00000002618(dist=1705)	7	133842277	A	G
intergenic	ENSSSCG00000002618(dist=16019),ENSSSCG00000025666(dist=7321)	7	133860918	C	G
intergenic	TRAM2(dist=84327),TMEM14A(dist=64766)	7	134146665	A	G
intergenic	GCM1(dist=46214),NONE(dist=NONE)	7	134562880	T	C
intronic	VSTM2A	9	153224139	A	G
intergenic	VSTM2A(dist=36212),SEC61G(dist=72975)	9	153275343	G	A
intronic	ENSSSCG00000021514	16	51575511	T	C
downstream	ENSSSCG00000016970	16	51686047	G	A
intronic	ENSSSCG00000016970	16	51716461	T	C
intergenic	ENSSSCG00000016970(dist=7954),ENSSSCG00000016969(dist=7379)	16	51732193	C	T
intergenic	CARTPT(dist=151833),MAP1B(dist=248142)	16	52143674	A	G
intergenic	CARTPT(dist=379703),MAP1B(dist=20272)	16	52371544	G	A
intronic	MAP1B	16	52416884	G	T
intergenic	ZNF366(dist=117209),ENSSSCG00000016977(dist=205873)	16	52851747	T	C
intergenic	ENSSSCG00000016977(dist=44886),ENSSSCG00000024289(dist=88983)	16	53102874	C	T
intergenic	ENSSSCG00000016977(dist=57117),ENSSSCG00000024289(dist=76752)	16	53115105	A	G
intergenic	ENSSSCG00000016977(dist=70962),ENSSSCG00000024289(dist=62907)	16	53128950	A	T
intergenic	ENSSSCG00000024289(dist=1177),TNPO1(dist=40932)	16	53194374	T	C
intergenic	TNPO1(dist=17431),ENSSSCG00000029037(dist=28982)	16	53305582	A	G
exonic	ENSSSCG00000029037	16	53336935	C	T
intergenic	ENSSSCG00000029037(dist=8731),ENSSSCG00000016979(dist=1319468)	16	53345669	C	T
intergenic	ENSSSCG00000029037(dist=30658),ENSSSCG00000016979(dist=1297541)	16	53367596	C	T
intergenic	ENSSSCG00000029037(dist=168339),ENSSSCG00000016979(dist=1159860)	16	53505277	G	T
intergenic	ENSSSCG00000029037(dist=284565),ENSSSCG00000016979(dist=1043634)	16	53621503	A	G
intergenic	ENSSSCG00000029037(dist=301100),ENSSSCG00000016979(dist=1027099)	16	53638038	A	G
intergenic	ENSSSCG00000029037(dist=419500),ENSSSCG00000016979(dist=908699)	16	53756438	T	C
intergenic	ENSSSCG00000029037(dist=458004),ENSSSCG00000016979(dist=870195)	16	53794942	C	G
intergenic	ENSSSCG00000029037(dist=532353),ENSSSCG00000016979(dist=795846)	16	53869291	G	A
intergenic	ENSSSCG00000029037(dist=544575),ENSSSCG00000016979(dist=783624)	16	53881513	G	A
intergenic	ENSSSCG00000029037(dist=553710),ENSSSCG00000016979(dist=774489)	16	53890648	A	G
intergenic	ENSSSCG00000029037(dist=773809),ENSSSCG00000016979(dist=554390)	16	54110747	A	G
intergenic	ENSSSCG00000016979(dist=14567),CPEB4(dist=114133)	16	54699405	T	C
intergenic	ENSSSCG00000016979(dist=22250),CPEB4(dist=106450)	16	54707088	A	G
intergenic	ENSSSCG00000016979(dist=45149),CPEB4(dist=83551)	16	54729987	G	A
intergenic	ENSSSCG00000016979(dist=106041),CPEB4(dist=22659)	16	54790879	A	C
intronic	CPEB4	16	54814515	G	T
intronic	CPEB4	16	54848472	C	T
intronic	CPEB4	16	54871896	C	T
intergenic	ENSSSCG00000016982(dist=19136),STC2(dist=310975)	16	55015972	C	T
intronic	ERGIC1	16	55691446	C	A
intronic	ERGIC1	16	55699815	C	T
intronic	ENSSSCG00000022478	16	56735969	C	T
intergenic	ENSSSCG00000022478(dist=65410),FGF18(dist=113057)	16	56808557	G	A
intronic	RANBP17	16	57132465	G	A
intronic	RANBP17	16	57228726	G	A
intronic	RANBP17	16	57315354	T	C
intronic	RANBP17	16	57339349	G	A
intergenic	GABRP(dist=22973),KCNIP1(dist=25687)	16	57518770	A	G
intergenic	KCNIP1(dist=175555),KCNMB1(dist=225331)	16	57734373	A	G
intergenic	C5orf58(dist=62699),ENSSSCG00000017008(dist=64755)	16	58150389	A	G
intergenic	ENSSSCG00000017008(dist=23783),ENSSSCG00000022520(dist=11914)	16	58300166	T	G
intergenic	ENSSSCG00000023671(dist=1106),FOXI1(dist=2898)	16	58328528	G	A
intergenic	ENSSSCG00000017011(dist=28197),ENSSSCG00000025965(dist=93082)	16	58751770	G	T
intergenic	ENSSSCG00000017011(dist=43471),ENSSSCG00000025965(dist=77808)	16	58767044	T	C
intergenic	ENSSSCG00000017011(dist=101097),ENSSSCG00000025965(dist=20182)	16	58824670	C	T
intergenic	ENSSSCG00000025965(dist=49339),SLIT3(dist=710975)	16	58915401	T	C
intergenic	ENSSSCG00000025965(dist=105825),SLIT3(dist=654489)	16	58971887	G	T
