# Supplementary material for: Identification of Selection Signatures and Candidate Genes Related to Environmental Adaptation and Economic Traits in Tibetan Pigs
Source: Animals (Basel). 2024 Feb 19;14(4):654. doi: 10.3390/ani14040654 (PMC10886212; doi:10.3390/ani14040654)
Supplement: Supplementary file 1 [file animals-14-00654-s001.zip › Table S3.xlsx]

## Sheet: NABP1
Table S3. The haplotypes around the representative genes based on their associated candidate SNPs.
NABP1 (chr. 15)
	CNC10152133 (position: 107433840)	CNC10152135 (position:107572576)	CNC10152136 (position: 107518766)	CNC10152137 (position: 107679540)	CNC10152138 (position: 107555465)	CNC10152140 (position: 107531799)	Frequency (High-altitude)	Frequency (Low-altitude)
Ht1	G	C	A	A	T	T	0.14167	/
Ht2	G	C	A	A	T	C	0.27046	/
Ht3	C	C	A	A	T	T	0.03248	0.42857
Ht4	C	C	G	T	T	T	0.04142	/
Ht5	C	T	G	T	T	T	0.10634	/
Ht6	C	C	A	T	A	T	0.04735	/
Ht7	G	T	G	T	T	C	0.18213	0.19388
Ht8	G	T	G	T	T	T	0.12519	/
Ht9	G	C	G	T	T	T	/	0.09184
Ht10	C	C	A	T	A	T	/	0.10204
Ht11	C	C	G	T	A	T	/	0.14286

## Sheet: ESR2
Table S3. The haplotypes around the representative genes based on their associated candidate SNPs.
ESR2 (chr. 1)
	CNC10013772 (position: 213902765)	CNC10013774 (position: 213961960)	CNC10013779 (position: 214160122)	CNC10013787 (position: 214548818)	CNC10013792 (position: 214783908)	CNC10013796 (position: 214942310)	CNC10013799 (position: 215165889)	CNC10013806 (position: 215610810)	CNC10013807 (position: 215632274)	CNC10013808 (position: 215636702)	CNC10013809 (position: 215650342)	Frequency (High-altitude)	Frequency (Low-altitude)
Ht1	G	A	T	A	G	C	T	G	C	C	G	0.09677	/
Ht2	A	A	T	A	G	T	T	G	C	C	G	0.05	/
Ht3	G	A	T	A	G	C	G	A	A	A	A	0.03128	/
Ht4	G	A	C	A	G	C	T	G	C	C	G	0.17479	0.11224
Ht5	G	A	T	A	G	C	G	G	C	C	G	0.02872	/
Ht6	G	G	T	A	A	C	G	G	C	C	G	0.03	/
Ht7	G	A	T	T	A	T	T	G	C	C	G	0.135	/
Ht8	G	G	T	A	G	C	T	G	C	C	G	0.04823	/
Ht9	A	A	C	A	G	C	T	G	C	C	G	0.04552	/
Ht10	G	A	T	T	A	T	T	G	C	C	A	0.03	/
Ht11	G	A	C	A	G	C	T	A	A	A	A	0.11292	/
Ht12	A	A	T	A	G	C	T	G	C	C	A	0.15448	/
Ht13	G	G	C	A	G	C	T	A	A	A	A	/	0.09184
Ht14	A	A	T	T	A	T	T	G	C	C	G	/	0.11224
Ht15	G	A	C	A	G	C	G	G	C	C	G	/	0.19388
Ht16	A	A	T	A	G	C	T	G	C	C	G	/	0.34694
Ht17	G	A	C	A	A	C	T	G	C	C	G	/	0.09184

## Sheet: DMRTA1
Table S3. The haplotypes around the representative genes based on their associated candidate SNPs.
DMRTA1 (chr. 1)
	CNC10013942 (position: 222277302)	CNC10013943 (position: 222343343)	CNC10013944 (position: 222374897)	CNC10013945 (position: 222391245)	CNC10013946 (position: 222396558)	Frequency (High-altitude)	Frequency (Low-altitude)
Ht1	G	A	G	C	A	0.14	/
Ht2	G	A	A	T	G	0.46	0.46939
Ht3	T	A	G	C	A	0.32	/
Ht4	G	G	A	T	G	0.05	0.45918

## Sheet: NTRK3
Table S3. The haplotypes around the representative genes based on their associated candidate SNPs.
NTRK3 (chr. 1)
	CNC10013759 (position: 213106704)	CNC10013762 (position: 213289442)	CNC10013763 (position: 213343555)	CNC10013765 (position: 213488913)	CNC10013772 (position: 213902765)	CNC10013774 (position: 213961960)	CNC10013779 (position: 214160122)	CNC10013787 (position: 214548818)	CNC10013792 (position: 214783908)	CNC10013796 (position: 214942310)	CNC10013799 (position: 215165889)	Frequency (High-altitude)	Frequency (Low-altitude)
Ht1	A	T	A	T	G	A	T	A	G	C	T	0.07	/
Ht2	A	G	G	C	A	A	T	A	G	T	T	0.045	/
Ht3	A	T	A	C	G	A	T	A	G	C	G	0.02977	/
Ht4	G	G	A	C	G	A	C	A	G	C	T	0.15837	/
Ht5	A	G	G	C	G	A	T	T	A	T	T	0.15982	/
Ht6	A	G	G	T	A	A	C	A	G	C	T	0.035	/
Ht7	A	T	A	C	G	G	T	A	G	C	T	0.035	/
Ht8	A	G	G	C	G	A	C	A	G	C	T	0.11473	/
Ht9	G	G	G	C	A	A	T	A	G	C	T	0.16496	/
Ht10	A	G	G	T	G	G	C	A	G	C	T	/	0.09184
Ht11	A	G	G	T	A	A	T	T	A	T	T	/	0.11224
Ht12	A	G	A	C	G	A	C	A	G	C	G	/	0.19388
Ht13	A	G	G	T	A	A	T	A	G	C	T	/	0.34694
Ht14	A	T	A	C	G	A	C	A	G	C	T	/	0.11224
Ht15	G	G	G	C	G	A	C	A	A	C	T	/	0.09184

## Sheet: MAP1B
Table S3. The haplotypes around the representative genes based on their associated candidate SNPs.
MAP1B (chr. 16)
	CNC10161025 (position: 52143674)	CNC10161031 (position: 52371544)	CNC10161033 (position: 52416884)	Frequency (High-altitude)	Frequency (Low-altitude)
Ht1	A	G	T	0.12957	/
Ht2	A	A	T	0.03677	/
Ht3	G	G	G	0.09354	0.13466
Ht4	G	A	T	0.02856	/
Ht5	A	A	G	0.11687	0.32653
Ht6	G	A	G	0.1828	/
Ht7	G	G	T	0.2401	/
Ht8	A	G	G	0.17179	0.47758

## Sheet: CARTPT
Table S3. The haplotypes around the representative genes based on their associated candidate SNPs.
CARTPT (chr. 16)
	CNC10161025 (position: 52143674)	CNC10161031 (position: 52371544)	Frequency (High-altitude)	Frequency (Low-altitude)
Ht1	A	A	0.15339	0.32653
Ht2	A	G	0.30161	0.4898
Ht3	G	A	0.21161	/
Ht4	G	G	0.33339	0.18367
